# Supplementary material for: Individuals Maintain Similar Rates of Protein Synthesis over Time on the Same Plane of Nutrition under Controlled Environmental Conditions
Source: PLoS One. 2016 Mar 28;11(3):e0152239. doi: 10.1371/journal.pone.0152239 (PMC4809500; doi:10.1371/journal.pone.0152239)
Supplement: S1 File — Excel data file containing the raw data used in this study. (XLSX) [file pone.0152239.s001.xlsx]

## Sheet: Raw excretion data
Ammonia-Nitrogen excretion over 72 hours after feeding a 4% Body mass meal containing 15N-labelled protein
		Time (hours)
Fish	wt(g)	6	12	24	36	48	60	72		Repeated-measured ANOVA on ammonia-nitrogen excretion rate
		ugN.g-1.h-1 excreted
1	15.06	7.10713	6.35901	2.61842	2.19566	1.34573	1.27844	1.21452
2	12.26	4.49429	4.02121	1.65579	1.60141	0.981512	0.932436	0.885814			SS	Degr. of	MS	F	p
3	10.69	4.44341	3.97568	1.63704	2.60992	1.59963	1.51964	1.44366		Intercept	1638.61	1	1638.61	219.257	3.80046e-11
4	12.53	6.16653	5.51742	2.27188	2.68023	1.64272	1.56059	1.48256		Error	127.049	17	7.47345
5	12.41	8.6758	7.76256	3.19635	3.53881	2.16895	2.0605	1.95748		TIME	511.76	6	85.2933	76.4209	0
6	13.28	6.86747	6.14458	2.53012	3.57932	2.19378	2.08409	1.97988		Error	113.842	102	1.1161
7	10.43	5.76862	5.16139	2.12528	1.4861	0.910834	0.865292	0.822028
8	11.67	6.89232	6.16681	2.53927	3.09911	1.89946	1.80448	1.71426		Posthoc-Tukey pairwise comparisons
9	8.54	12.459	11.1475	4.59016	1.75449	1.07533	1.02157	0.970487			{1}	{2}	{3}	{4}	{5}	{6}	{7}
10	9.48	9.35302	8.3685	3.44585	4.74156	2.90612	2.76081	2.62277		1		0.354855	0.000119608	0.000119608	0.000119608	0.000119608	0.000119608
11	9.8	7.17347	6.41837	2.64286	3.58503	2.19728	2.08741	1.98304		2	0.354855		0.000119608	0.000119608	0.000119608	0.000119608	0.000119608
12	14.11	6.59816	5.90361	2.4309	2.96598	1.81786	1.72697	1.64062		3	0.000119608	0.000119608		0.309876	0.734547	0.544774	0.367455
13	11.67	4.83005	4.32162	1.77949	1.68238	1.03113	0.979577	0.930598		4	0.000119608	0.000119608	0.309876		0.00619254	0.00233392	0.000927553
14	11.26	7.08703	6.34103	2.61101	3.16607	1.9405	1.84347	1.7513		5	0.000119608	0.000119608	0.734547	0.00619254		0.999951	0.997494
15	13.24	6.07503	5.43555	2.23817	7.45342	4.56823	4.33982	4.12283		6	0.000119608	0.000119608	0.544774	0.00233392	0.999951		0.999964
16	10.55	7.80411	6.98262	2.8752	7.73776	4.7425	4.50537	4.2801		7	0.000119608	0.000119608	0.367455	0.000927553	0.997494	0.999964
17	9.04	7.14602	6.39381	2.63274	1.37168	0.840708	0.798673	0.758739
18	15.36	8.12283	7.2678	2.99262	5.44922	3.33984	3.17285	3.01421
	11.7433	7.05913	6.31606	2.60073	3.37212	2.06678	1.96344	1.86527	Data used in Figure 1b
	1.97908	1.8918	1.69266	0.696979	1.89292	1.16018	1.10217	1.04706
		Time (hours)
Fish	wt(g)	6	12	24	36	48	60	72
		cumulative excretion		% e*
1	15.06	2.50175	12.0993	20.8609	23.9901	24.2539	29.2053	21.2851		Repeated-measured ANOVA on cumulative rate of isotope excretion
2	12.26	2.50796	12.1437	26.4902	24.0781	26.7507	27.6374	33.4694
3	10.69	2.57931	12.472	25.7272	24.729	27.4739	28.3846	40.7034			SS	Degr. of	MS	F	p
4	12.53	2.68722	12.9963	22.4073	25.7684	28.6287	29.5777	26.6777		Intercept	46773.6	1	46773.6	1388.3	0
5	12.41	2.33554	11.3688	19.6015	20.0555	25.0438	25.8739	18.3542		Error	572.752	17	33.6913
6	13.28	2.19521	10.6235	18.3165	21.0639	23.402	24.1777	25.3866		TIME	8603.55	6	1433.92	118.087	0
7	10.43	2.1121	10.2085	26.3445	38.5138	20.4636	17.9529	34.6642		Error	1238.58	102	12.1429
8	11.67	2.33542	11.2879	19.4619	29.9776	24.8655	25.6897	29.474
9	8.54	2.99844	14.4924	24.987	28.735	20.4774	32.9828	25.6689		Posthoc-Tukey pairwise comparisons
10	9.48	2.54066	12.2799	21.1722	24.348	19.365	27.9473	20.8675			TIME	{1}	{2}	{3}	{4}	{5}	{6}	{7}
11	9.8	2.22909	10.7739	23.6292	21.3621	23.7333	22.2909	23.4055		1	t1		0.000119608	0.000119608	0.000119608	0.000119608	0.000119608	0.000119608
12	14.11	2.51203	12.1415	20.9336	22.1064	26.7458	27.6323	19.0673		2	t2	0.000119608		0.000119608	0.000119608	0.000119608	0.000119608	0.000119608
13	11.67	2.41035	11.65	27.5447	23.0992	32.3584	26.5138	27.8395		3	t3	0.000119608	0.000119608		0.533249	0.0814766	0.0230174	0.0286137
14	11.26	2.00004	9.66685	16.667	19.167	23.2113	22.0004	26.1731		4	t4	0.000119608	0.000119608	0.533249		0.954588	0.768927	0.809855
15	13.24	2.00399	9.68593	16.6999	19.2049	29.0186	22.0438	23.146		5	t5	0.000119608	0.000119608	0.0814766	0.954588		0.999256	0.999741
16	10.55	2.06043	9.95875	17.1703	19.7458	21.9376	20.6043	21.6345		6	t6	0.000119608	0.000119608	0.0230174	0.768927	0.999256		1
17	9.04	1.88397	9.10587	17.3897	18.0547	20.0588	20.7237	21.7599		7	t7	0.000119608	0.000119608	0.0286137	0.809855	0.999741	1
18	15.36	2.8389	13.7214	23.6575	23.2607	30.226	26.4964	16.5912
	11.7433	2.37402	11.482	21.6145	23.7367	24.8897	25.4297	25.3427	Data used in Figure 1b
	1.97908	0.303747	1.46863	3.64195	4.89429	3.73616	3.84907	6.18933																	mean
																									sd

## Sheet: Excretion data for Figure 1
T (hours)	ug/g/h		Cumulative 15N excretion (% dose)
	mean	SD	mean	SD
6	7.05913	1.8918	2.37402	0.303747
12	6.31606	1.69266	11.482	1.46863
24	2.60073	0.696979	21.6145	3.64195
36	3.37212	1.89292	23.7367	4.89429
48	2.06678	1.16018	24.8897	3.73616
60	1.96344	1.10217	25.4297	3.84907
72	1.86527	1.04706	25.3427	6.18933
					Fig 1	Validation of stochastic end-point model to measure rates of protein synthesis in P. flesus on d14

## Sheet: Synthesis data for Figure 2
Fish	Mass d1	Mass d14	Mass d42	Ar d 14	Ar d42	Ar d 14	Ar d42	As d14	As d42	As d14	As d42	As/Ar1	As/Ar2
				mg Protein/d	mg Protein/d	mass-corrected 12g		mg Protein/d	mg Protein/d	mass-corrected 12g		using mass-corrected data
1	12.9	15.06	18.92	27.74	36.56	23.4	25.98	33.32	48.24	28.16	34.44	1.20342	1.32564		Mass corrected to 12 g using the following equation:
2	10.76	12.26	15.5	13.52	22.54	13.3	26.7	16.77	30.24	16.51	24.96	1.24135	0.934831
3	9.4	10.69	12.97	13.99	19.73	15.26	18.61	12.65	19.75	13.78	18.64	0.903014	1.00161		mass corrected rate = Observed rate*(12/observed mass)^b
4	11.01	12.53	15.2	19.59	19.85	18.97	16.63	20.59	27.4	19.94	23	1.05113	1.38304
5	11.07	12.41	14.15	29.94	23.49	29.2	20.76	35.31	37.09	34.44	32.83	1.17945	1.58141		where b = 0.74 for protein synthesis and b = 0.75 for protein cinsumption
6	11.73	13.28	14.29	23.62	19.9	21.89	17.46	31.71	38.06	29.42	33.45	1.34399	1.91581
7	9.17	10.43	12.08	16.1	24.78	17.89	24.66	23.92	21.54	26.54	21.43	1.48351	0.869019
8	10.28	11.67	13.24	20.42	26.15	20.85	24.29	26.31	25.4	26.86	23.61	1.28825	0.972005
9	6.86	8.54	9.63	22.08	27.94	28.5	32.95	27.43	27.57	35.28	32.44	1.23789	0.984522
10	7.59	9.48	10.19	25.75	27.78	30.73	31.4	25.07	25.95	29.85	29.29	0.971363	0.932803
11	8.23	9.8	10.41	21.21	25.83	24.69	28.74	24.17	24.8	28.08	27.55	1.1373	0.958594
12	11.64	14.11	14.91	28.38	30.74	25.13	26.12	27.37	23.55	24.28	20.05	0.966176	0.767611
13	10.18	11.67	14.3	15.5	23.39	15.83	20.51	18.22	20.22	18.6	17.75	1.17498	0.865431
14	9.29	11.26	12.94	24.88	32.35	26.1	21.3	22.22	32.24	23.31	34.12	0.893103	1.60188
15	11.75	13.24	15.85	28.45	20.36	26.43	16.53	25.48	23.49	23.69	19.12	0.89633	1.15668
16	9.28	10.55	12.78	24.12	25.81	26.57	24.62	27.02	27.7	29.72	26.44	1.11855	1.07392
17	6.34	9.04	11.14	25.02	28.11	30.94	29.72	30.27	30.08	37.33	31.78	1.20653	1.06931
18	12.82	15.36	16.85	33.44	30.73	27.79	23.82	27.33	29.34	22.77	22.82	0.819359	0.958018
Mean	10.0167	11.7433	13.6306	22.9861	25.8911	23.5261	23.9333	25.2867	28.4811	26.0311	26.3178	1.11754	1.13067
SD	1.91316	1.97908	2.43295	5.7	4.73201	5.44888	4.96173	5.76539	7.07416	6.38435	5.82875	0.179856	0.308864
										Data used in Figure 2
						Fig 2	Consistency in rates of protein synthesis in P. flesus maintained
							on the same plane of nutrition

## Sheet: Data for Figure 3
Ar and As mass-corrected to a 12g fish (original data provided in source references)
		Ar	As	Species	Body mass (g)	ToC	Reference
		23.5	26	Flounder	12	14	This study
		23.9	26.3	Flounder	12	14	This study
		67.7	79.2	Greenback	39	16	Carter & Bransden (2001)
		123.7	149.6	Greenback	37	16	Carter & Bransden (2001)
		61.8	79.5	trout	100	14	McCarthy (1993)
		71.8	62.4	trout	100	14	Carter et al. (1994)
		42.9	55.4	Flounder	50	14.9	Carter et al. (1998)
		107.5	106.5	Salmon	283	14	Carter et al. (1993)
		174	169.7	trout	305	14	Dobly et al (2003)
		Data used in Figure 3
	Fig 3	Effect of protein cinsumption on protein synthesis infishes at 14-16⁰C
	Figure 3

## Sheet: Data for Figure 4
Repeatability of metabolic rate										Burst locomotor performance
Data taken from Table S1 of White et al (2013). J. Exp. Biol. 216:1763-1765										Data taken from Table S2 of Laming et al (2013). J. Exp. Biol. 216:3264-3272											Fig 4.	Temporal changes in repeatability of physiological performance
Routine Metabolic Rate					Maximum Metabolic Rate
Time (d)	r		Data used in Figure 4		Time (d)	r		Data used in Figure 4		Time (d)	r		Data used in Figure 4				Data used in Figure 4
0.3	0.28		< 1 day	0.6	1	0.79		1-2 days	0.514348	0	0.44		< 1 day	0.648278		RMR	MMR	Burst	Synthesis
0.3	0.37		1-2 days	0.61	1	0.64		1-2 weeks	0.521667	0.001	0.805		1-2 days	0.71675	1	0.6
0.3	0.87		1-2 weeks	0.54	1	0.84		I month	0.658	0.001	0.663		1-2 weeks	0.5	2	0.61
0.3	0.93		I month	0.46	1	0.42		3 months	0.4511	0.001	0.812		I month	0.42	10	0.54
0.3	0.41		3 months	0.23	1	0.13		1 year	0.3735	0.001	0.709		3 months	0.417143	21	0.46
0.3	0.08		1 year	0.27	1	0.98		> 1 year	0.245	0.001	0.528		1 year	0.475	60	0.23					275
0.3	0.89		> 1 year	0.32	1	0.82				0.001	0.842		> 1 year	0.3375	138	0.27					137.5
0.3	0.85				1	-0.1				0.001	0.823				365	0.32
0.3	0.6				2	0.54				0.001	0.92				2		0.51
0.3	0.67	0.595			2	0.64				0.001	0.78				10		0.52
1	0.796				2	0.69				0.001	0.26				21		0.66
1	0.625				2	0.07				0.001	0.82				60		0.45
1	0.62				2	0.19				0.001	0.52				138		0.37
1	0.49				2	0.77				0.001	0.55				365		0.25
1	0.87				2	0.39				0.04	0.547				1			0.65
2	0.55				2	0.47				0.04	0.48				2			0.72
2	0.49				2	0.53				0.06	0.83				10			0.5
2	0.55				2	0.43				0.08	0.34	0.648278			21			0.42
2	0.6				2	0.48				1	0.65				60			0.42
2	0.62	0.60805			2	0.59				1	0.946				138			0.43
2.5	0.38				2	0.33				1	0.535				365			0.34
3	0.71				2	0.65				1	0.778				32				0.68
4	0.86				2	0.54	0.514348			1	0.5
5	0.34				3	0.74				1	0.772
8	0.87				4	0.64				1	0.84				Average	0.432857	0.46	0.497143
13	0.55				4	0.63				1	0.92
15	0.38				5	0.34				1	0.59
15	0.25	0.5425			12	0.4				1	0.56
17	0.07				12	0.38	0.521667			2	0.94
21	0.69				28	0.79				2	0.57	0.71675
23	0.77				28	0.74				4	0.45
24	0.314				28	0.31				7	0.45
25	0.22				28	0.55				7	0.63
25	0.77				28	0.9	0.658			8	0.43
28	0.4				35	0.32				8	0.54	0.5
29	0.255				35	0.36				28	0.43
30	0.53				35	0.38				28	0.41	0.42
30	0.68				56	0.78				42	0.37
30	0.35				56	0.57				42	0.48
30	0.56				56	0.21				61	0.37
30	0.43	0.464538			56	0.901				84	0.37
35	0.57				68	0.39				84	0.39
35	0.58				70	0.25				91	0.76
35	0.52				70	0.35	0.4511			91	0.18	0.417143
35	0.72				105	0.23				126	0.44
40	0.121				180	0.517	0.3735			168	0.49
48	0.57				548	0.47				210	0.5
52	0.057				548	0.02	0.245			213	0.47	0.475
56	0.23									456	0.425
61	0.007									456	0.25	0.3375
61	0.003
61	0.059
61	0.099
61	0.18
61	0.014
61	0.061
70	0.16
70	0.42
92	-0.05
95	0.121	0.233789
105	0.09
120	0.63
142	-0.099
153	0.65
154	0.36
183	0.017
192	0.09
192	0.72
195	-0.001	0.273
380	0.32
